# Supplementary material for: Cognitive and behavioural outcome of children born after IVF at age 9 years
Source: PubMed Central journal article supplement — Hum Reprod. 2019 Nov 11;34(11):2193–200. doi: 10.1093/humrep/dez202 (PMC9185894; doi:10.1093/humrep/dez202), 2019-11-11
Supplement: HUMREP_34_11_2193_s1.pdf [file HUMREP_34_11_2193_s1.pdf]

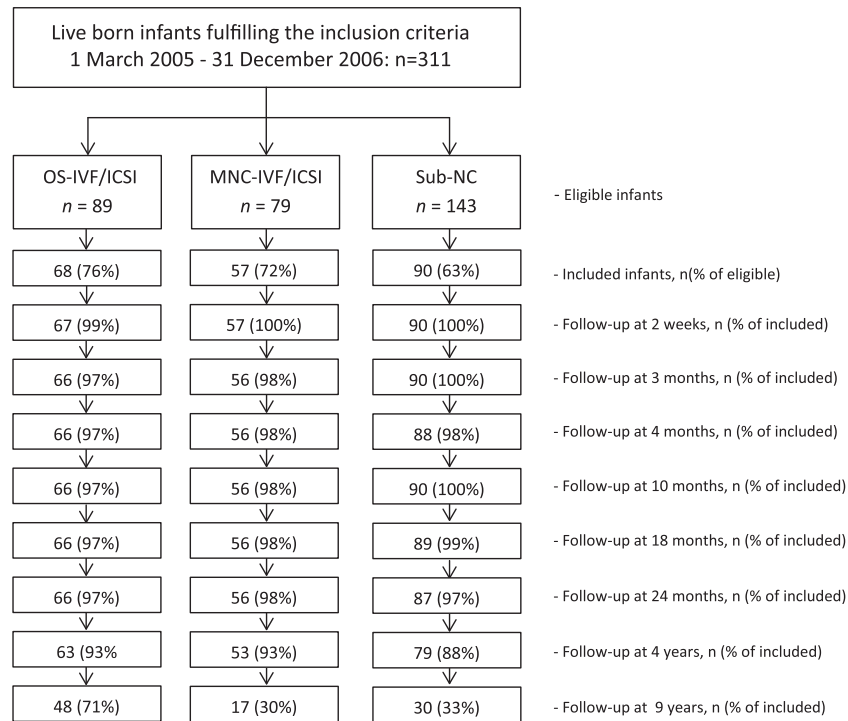

**Supplementary Figure S1** Flow diagram of the Groningen ART cohort study. 19 Singletons born following IVF or ICSI with ovarian stimulation (OS-IVF/ICSI; n=57), born after modified 20 natural cycle IVF/ICSI (MNC-IVF/ICSI; n=46) and born after natural conception to subfertile couples 21 (Sub-NC; n=66) were assessed at 9 years.
